# Supplementary material for: MOF derived metal oxide nanohybrids with in situ grown rGO: a smart material for simultaneous electrochemical sensing of HQ and RS
Source: Royal Society of Chemistry journal article supplement (doi:10.1039/d3en00745f), 2023-12-12
Supplement: d3en00745f1.pdf [file d3en00745f1.pdf]

## Electronic Supplementary Information

### MOFs derived metal oxides nanohybrids with *in-situ* grown rGO: A smart material for simultaneous electrochemical sensing of HQ and RS

Tayyaba Iftikhar<sup>a,1</sup>, Muhammad Irfan Majeed<sup>b</sup>, Ayesha Aziz<sup>c</sup>, Anees A. Khadom<sup>d</sup>, Zhuo Huang<sup>e</sup>, Ghazala Ashraf<sup>c</sup>, Guangfang Li<sup>a</sup>, Muhammad Asif<sup>a,2,\*</sup>, Fei Xiao<sup>a,\*</sup>, and Hongfang Liu<sup>a,\*</sup>

<sup>a</sup>Key Laboratory of Material Chemistry for Energy Conversion and Storage, Ministry of Education, Hubei Key Laboratory of Material Chemistry and Service Failure, Hubei Engineering Research Center for Biomaterials and Medical Protective Materials, School of Chemistry and Chemical Engineering, Huazhong University of Science and Technology, Wuhan 430074, P. R. China

<sup>b</sup>University of Agriculture, Faisalabad, Punjab, Pakistan

<sup>c</sup>College of Life Science and Technology, Huazhong University of Science and Technology (HUST), Wuhan, 430074, P. R. China

<sup>d</sup>Department of Chemical Engineering, College of Engineering, University of Diyala, Baquba City 32001, Diyala Governorate, Iraq

<sup>e</sup>Changjiang River Scientific Research Institute of Changjiang Water Resources Commission, 289 Huangpu Street, Wuhan, Hubei, P. R. China

\*Corresponding authors:

asif83chemist@gmail.com (M. Asif); xiaofei@hust.edu.cn (F. Xiao); liuhf@hust.edu.cn (H. Liu)

#### Randles–Sevcik equation

---

<sup>1</sup>School of Biomedical Engineering, International Health Science Innovation Center, Shenzhen Key Laboratory of Nano-Biosensing Technology, Marshall Laboratory of Biomedical Engineering, Medical School, Shenzhen University, Shenzhen 518055, P.R. China

<sup>2</sup>School of Chemistry and Chemical Engineering, Shanxi University, Taiyuan, China

25 Fig. S1 shows how the Randles–Sevcik equation can be used to determine the  
26 electrochemically active surface area of various electrodes.<sup>1-3</sup>

27 
$$I_p = (2.69 \times 10^5) n^{3/2} AC^*D^{1/2}v^{1/2} \quad (1)$$

28 The numbers  $n$ ,  $A$ ,  $D$ ,  $c$ , and  $v$  in the preceding equation represent the number of electrons transfer,  
29 area of electrode, electroactive molecule diffusion coefficient in the solution, probe molecule  
30 concentration in the bulk solution, and scan rate, respectively. In this case,  $\text{Fe}(\text{CN})_6^{3-/4-}$   
31 concentration =  $2.0 \times 10^{-3}$  M while  $D = 7.60 (\pm 0.02) 10^{-6}$   $\text{cm}^2 \text{ s}^{-1}$ . HKUST-1/rGO/CuO/ $\alpha$ - $\text{Fe}_2\text{O}_3$   
32 ( $0.237 \text{ cm}^2$ ) has a larger electrochemical surface area than HKUST-1/rGO/CuO ( $0.196 \text{ cm}^2$ ),  
33 HKUST-1/CuO ( $0.149 \text{ cm}^2$ ), HKUST-1 ( $0.127 \text{ cm}^2$ ), and bare GCE ( $0.0678 \text{ cm}^2$ ) respectively.

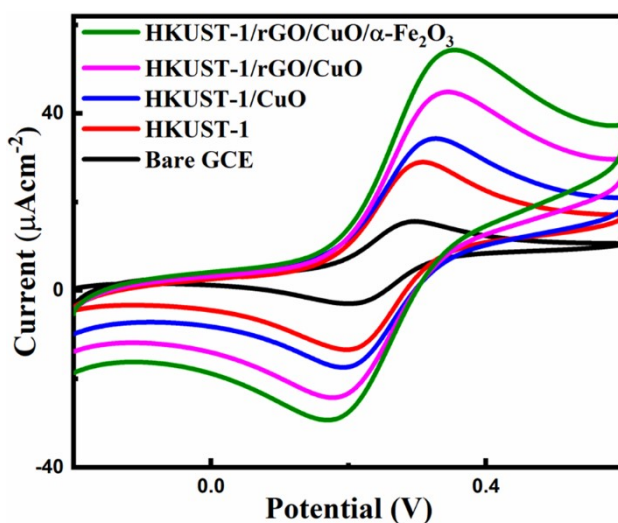

34

35 **Fig. S1** Cyclic voltammograms of Bare GCE, HKUST-1/GCE, HKUST-1/CuO/GCE, HKUST-  
36 1/rGO/CuO/GCE, and HKUST-1/rGO/CuO/ $\alpha$ - $\text{Fe}_2\text{O}_3$ /GCE in 0.1 M KCl with 1 mM  $\text{K}_4\text{Fe}(\text{CN})_6$   
37 and 1 mM  $\text{K}_3\text{Fe}(\text{CN})_6$ .

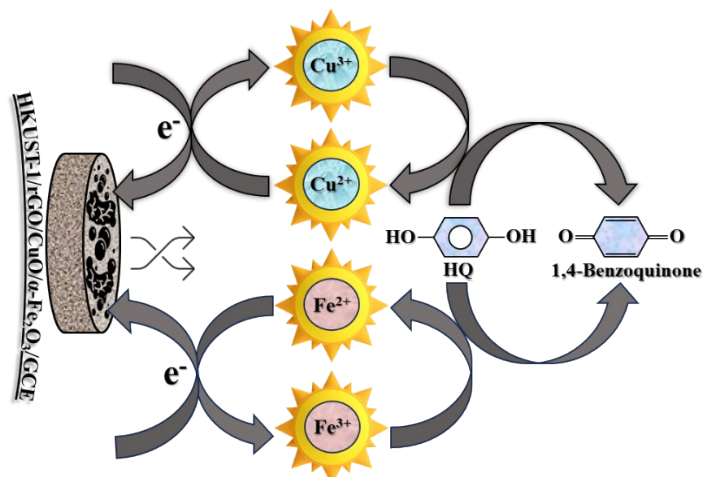

38

39 **Fig. S2** Electrooxidation reaction mechanism of HQ on GCE modified HKUST-1/rGO/CuO/ $\alpha$ -  
 40  $\text{Fe}_2\text{O}_3$ .

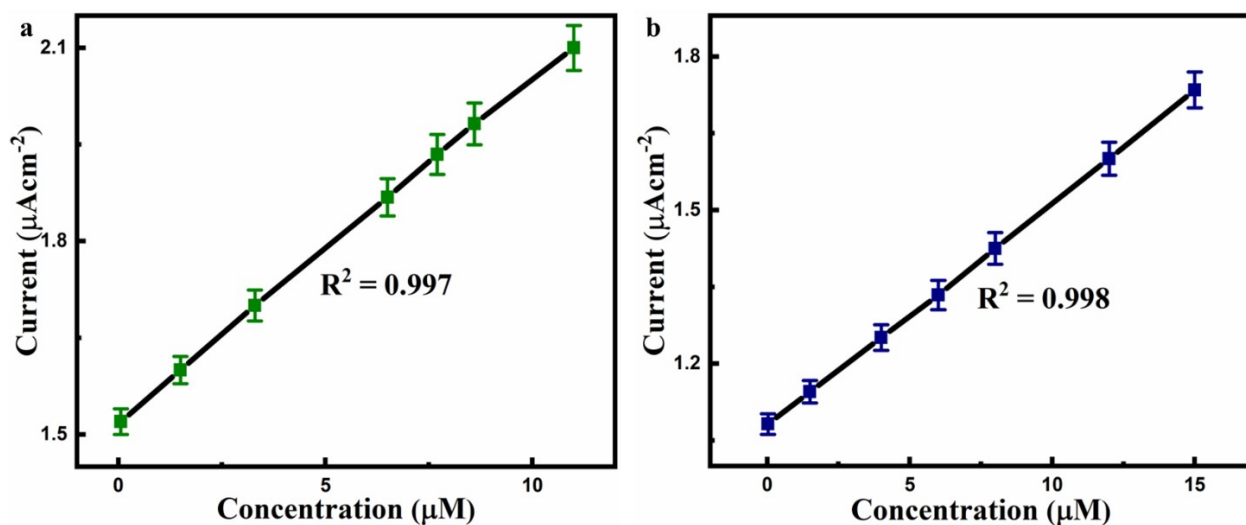

41

42 **Fig. S3 (a, b)** The linear calibration plots of current versus various concentration of each analyte  
 43 in co-existence system of HQ and RS.

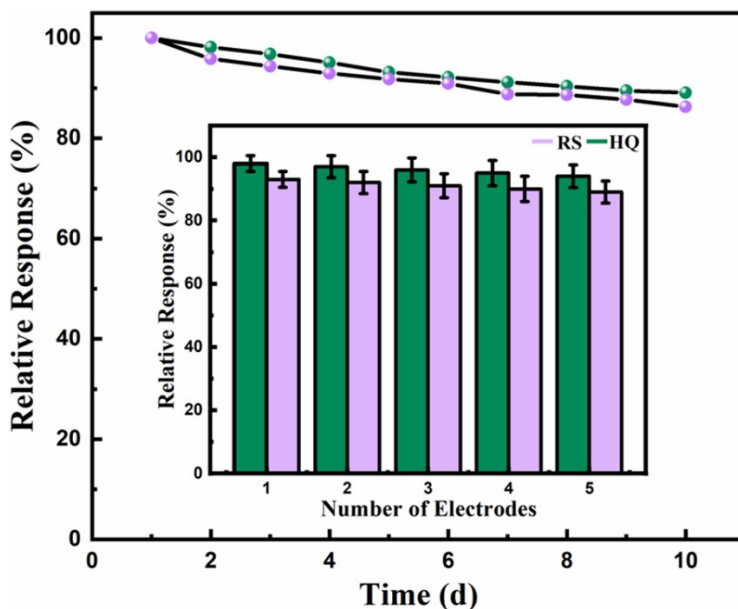

44

45 **Fig. S4** Long-term stability assessment of HKUST-1/rGO/CuO/ $\alpha$ -Fe<sub>2</sub>O<sub>3</sub> modified GCE. Inset:  
 46 Reproducibility test of HKUST-1/rGO/CuO/ $\alpha$ -Fe<sub>2</sub>O<sub>3</sub>/GCE of five different electrodes in 5 mM  
 47 HQ and RS (n = 3).

48 In our investigation, we performed detailed calculations to assess critical physical properties,  
 49 including pore size, pore volume, and surface area. These parameters, crucial in understanding  
 50 material characteristics, are summarized and presented in Table S1, offering a comprehensive  
 51 overview of our findings.

52 **Table S1** Assessment of physical properties, encompassing BET Surface Area and Pore  
 53 Parameters, through BET analysis

| Sample                                                        | Pore Size<br>(nm) | Pore Volume<br>(cm <sup>3</sup> /g) | BET surface area<br>(m <sup>2</sup> /g) |
|---------------------------------------------------------------|-------------------|-------------------------------------|-----------------------------------------|
| HKUST-1                                                       | 2.194             | 0.014                               | 31.203                                  |
| HKUST-1/CuO                                                   | 2.983             | 0.036                               | 39.436                                  |
| HKUST-1/rGO/CuO                                               | 4.875             | 0.183                               | 51.785                                  |
| HKUST-1/rGO/CuO/ $\alpha$ -<br>Fe <sub>2</sub> O <sub>3</sub> | 5.398             | 0.231                               | 60.018                                  |

54

## 55 **References**

- 56 1 G. Ashraf, M. Asif, A. Aziz, T. Iftikhar and H. Liu, Rice-spikelet-like copper oxide decorated with  
57 platinum stranded in the CNT network for electrochemical in vitro detection of serotonin, ACS  
58 Appl. Mater. Interfaces, 2021, **13**, 6023-6033.
- 59 2 M. Asif, A. Aziz, G. Ashraf, Z. Wang, J. Wang, M. Azeem, X. Chen, F. Xiao and H. Liu, Facet-  
60 inspired core-shell gold nanoislands on metal oxide octadecahedral heterostructures: high sensing  
61 performance toward sulfide in biotic fluids, ACS Appl. Mater. Interfaces, 2018, **10**, 36675-36685.
- 62 3 M. Asif, A. Aziz, H. Wang, Z. Wang, W. Wang, M. Ajmal, F. Xiao, X. Chen and H. Liu,  
63 Superlattice stacking by hybridizing layered double hydroxide nanosheets with layers of reduced  
64 graphene oxide for electrochemical simultaneous determination of dopamine, uric acid and  
65 ascorbic acid, Microchim. Acta, 2019, **2**, 1-11.

66
