# Supplementary figures and images for: MOF derived metal oxide nanohybrids with in situ grown rGO: a smart material for simultaneous electrochemical sensing of HQ and RS
Source: Royal Society of Chemistry journal article supplement (doi:10.1039/d3en00745f), 2023-12-12

# Fig. S1

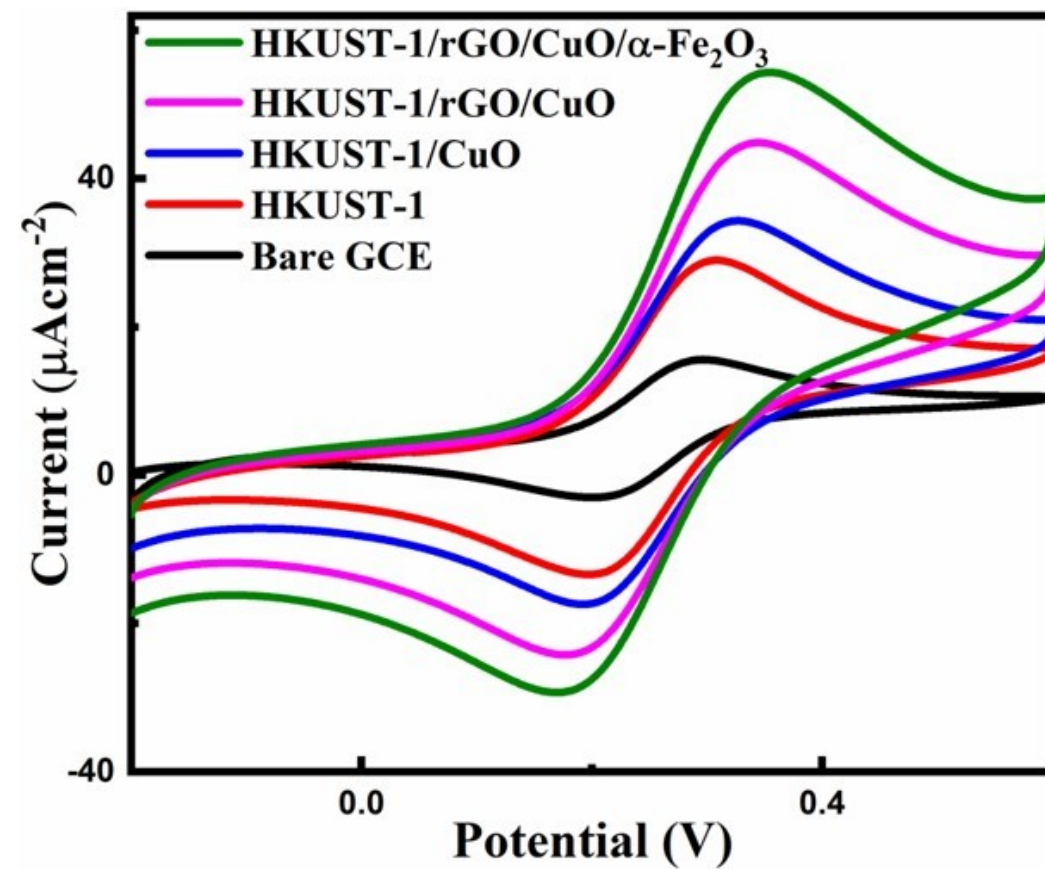

**Fig. S2**

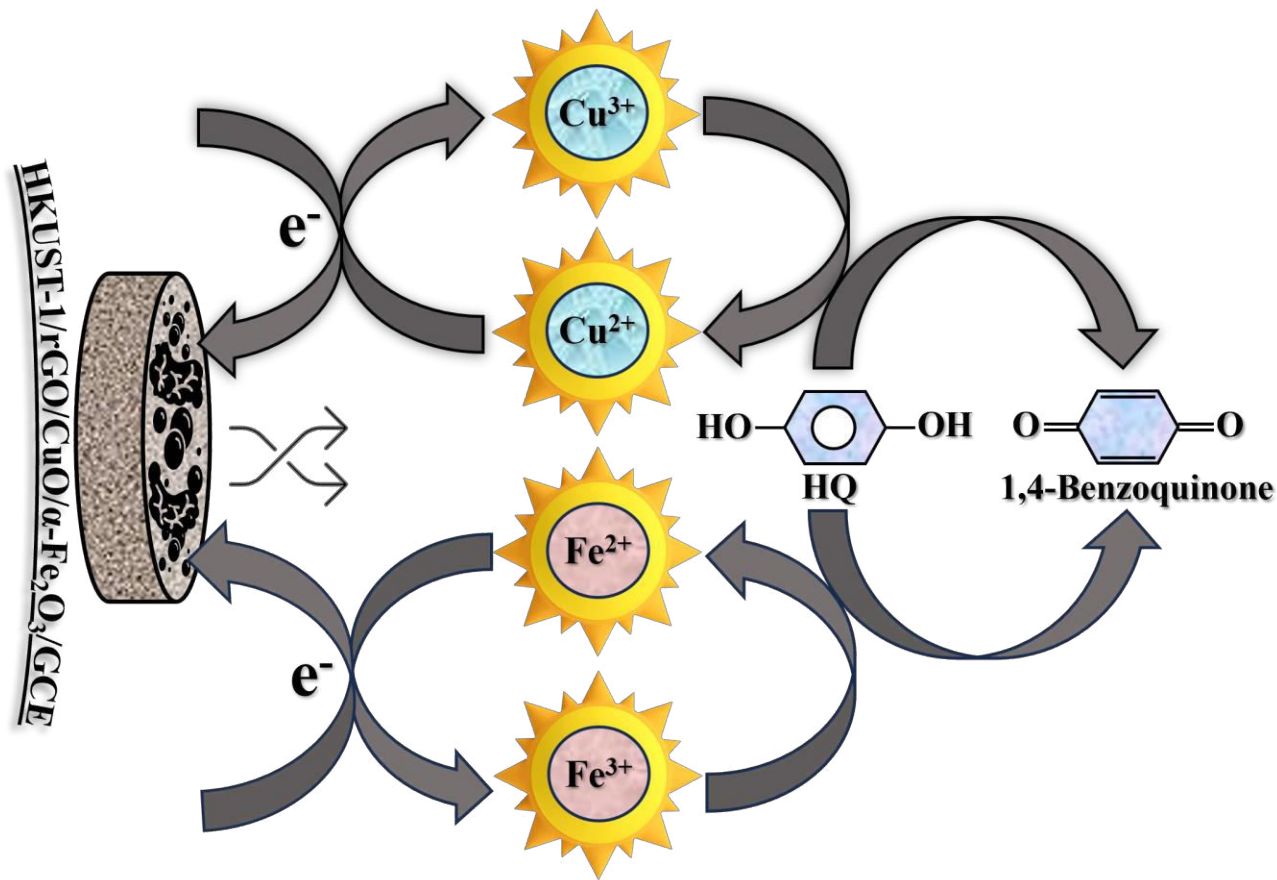

**Fig. S3**

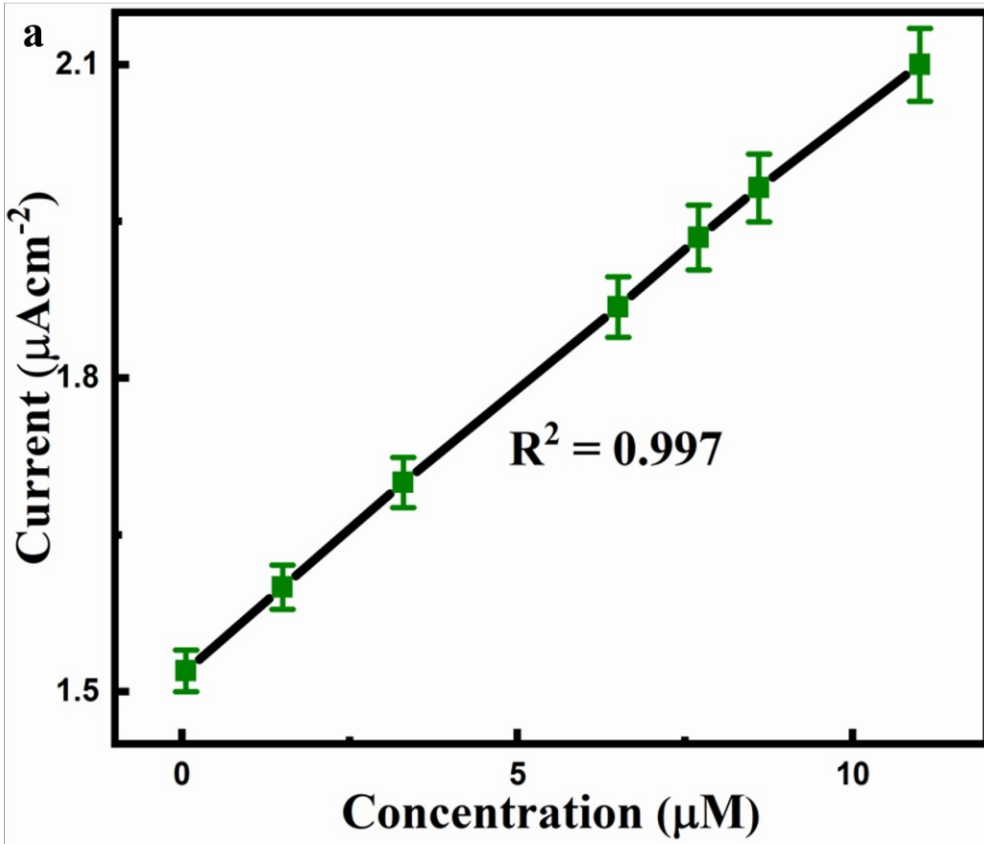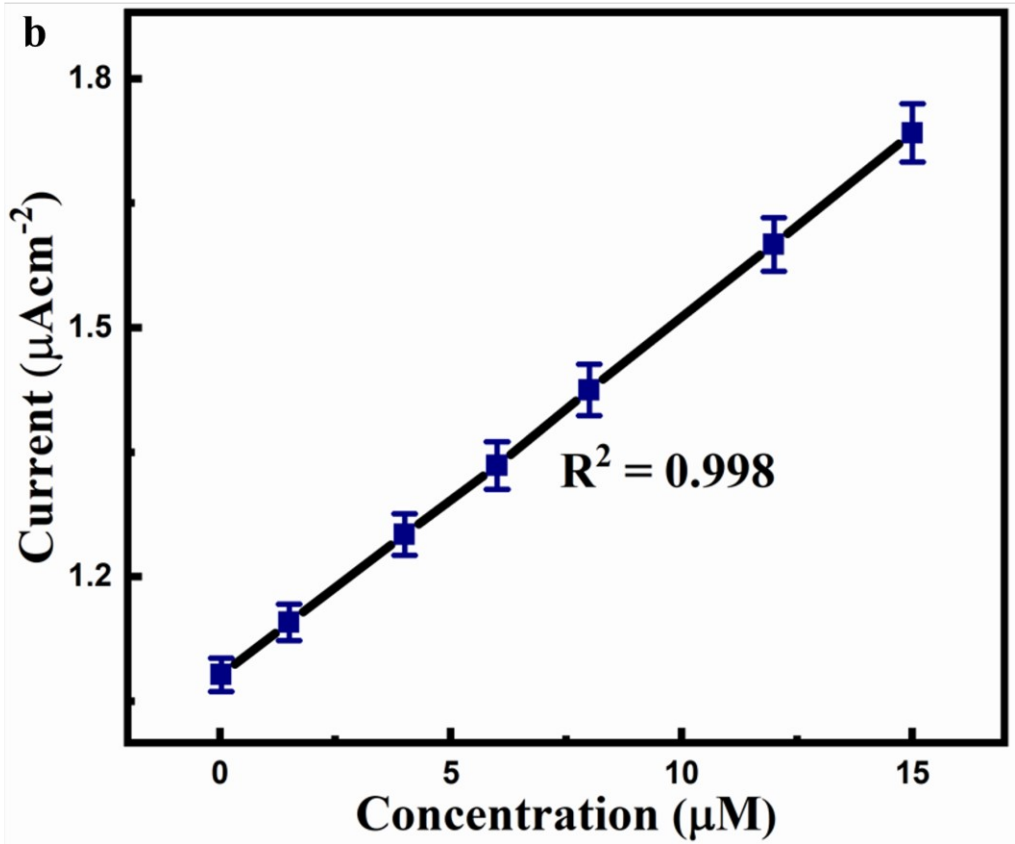

**Fig. S4**

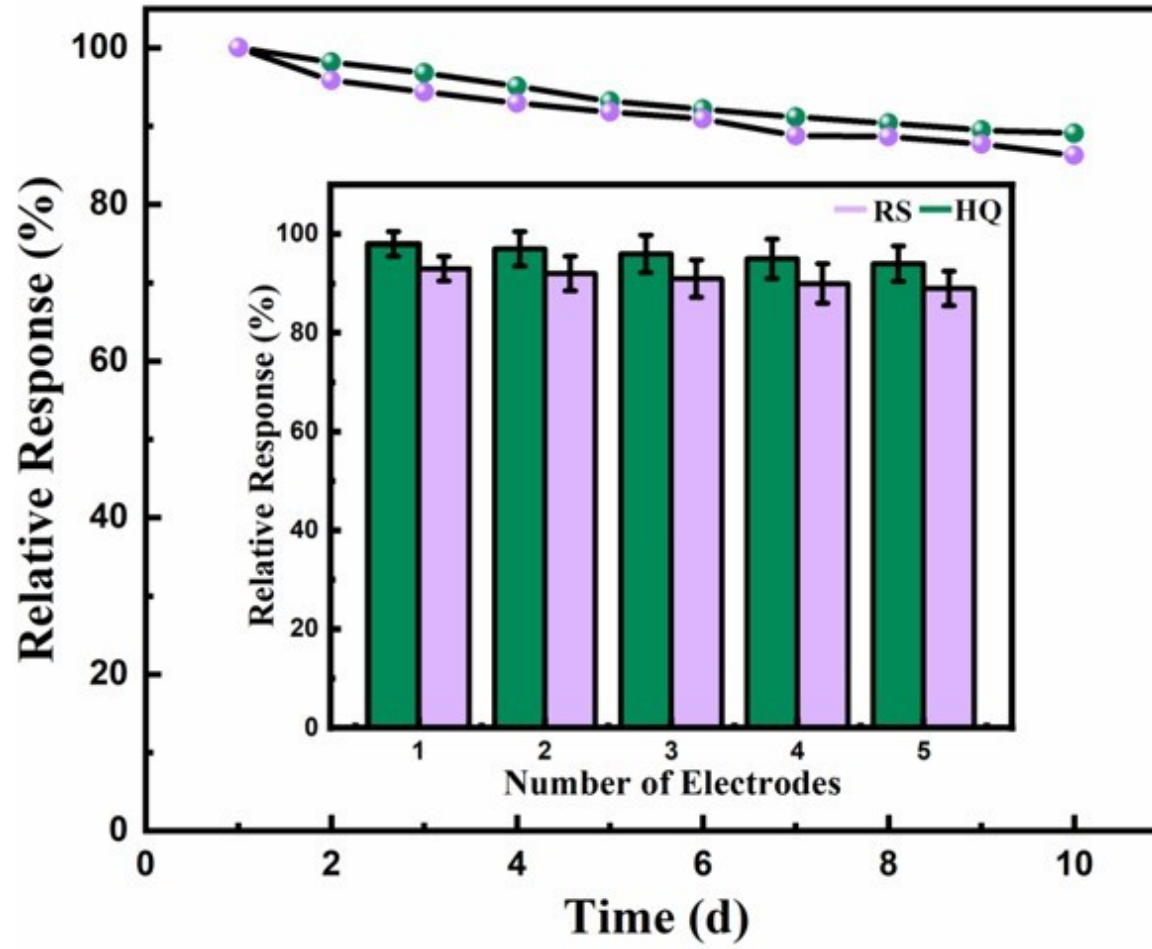

Supplement: d3en00745f2.pdf [file d3en00745f2.pdf]
